# Supplementary material
Source: MDPI journal article supplement (https://www.mdpi.com/2304-6740/3/4/0534)

# checkCIF/PLATON report

Structure factors have been supplied for datablock(s) 1, 2, 3, 4

THIS REPORT IS FOR GUIDANCE ONLY. IF USED AS PART OF A REVIEW PROCEDURE FOR PUBLICATION, IT SHOULD NOT REPLACE THE EXPERTISE OF AN EXPERIENCED CRYSTALLOGRAPHIC REFEREE.

No syntax errors found.      CIF dictionary      Interpreting this report

## Datablock: 1

---

Bond precision:    C-C = 0.0108 Å

Wavelength=0.71073

Cell:                a=11.1262(9)                b=14.6920(14)                c=14.7874(14)  
                      alpha=70.037(9)                beta=85.302(8)                gamma=81.302(7)  
Temperature:        150 K

|                | Calculated               | Reported                 |
|----------------|--------------------------|--------------------------|
| Volume         | 2244.7(4)                | 2244.7(4)                |
| Space group    | P -1                     | P -1                     |
| Hall group     | -P 1                     | -P 1                     |
| Moiety formula | C35 H51 B2 Ce N14, C7 H8 | C35 H51 B2 Ce N14, C7 H8 |
| Sum formula    | C42 H59 B2 Ce N14        | C42 H59 B2 Ce N14        |
| Mr             | 921.77                   | 921.77                   |
| Dx,g cm-3      | 1.364                    | 1.364                    |
| Z              | 2                        | 2                        |
| Mu (mm-1)      | 1.061                    | 1.061                    |
| F000           | 954.0                    | 954.0                    |
| F000'          | 953.70                   |                          |
| h,k,lmax       | 13,17,17                 | 13,17,17                 |
| Nref           | 8234                     | 8201                     |
| Tmin,Tmax      | 0.834,0.905              | 0.806,1.000              |
| Tmin'          | 0.834                    |                          |

Correction method= # Reported T Limits: Tmin=0.806 Tmax=1.000  
AbsCorr = GAUSSIAN

Data completeness= 0.996

Theta(max)= 25.350

R(reflections)= 0.0642( 6502)

wR2(reflections)= 0.1414( 8201)

S = 1.037

Npar= 547

---

The following ALERTS were generated. Each ALERT has the format  
**test-name\_ALERT\_alert-type\_alert-level.**  
Click on the hyperlinks for more details of the test.

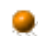

#### Alert level B

PLAT910\_ALERT\_3\_B Missing # of FCF Reflection(s) Below Th(Min) ... 16 Report

**Author Response: Reduction of beam stop mask did not yield significant improvement. Most of those missing strong reflections appeared to be very strong and were treated as overflows.**

PLAT971\_ALERT\_2\_B Check Calcd Residual Density 1.05A From Cel 3.46 eA-3

**Author Response: The residual density could not be modelled as any chemically sensible species. Since the peak is in the proximity of a strong absorber, this could be due to imperfections in the absorption corrections.**

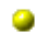

#### Alert level C

PLAT094\_ALERT\_2\_C Ratio of Maximum / Minimum Residual Density .... 2.15 Report  
PLAT213\_ALERT\_2\_C Atom N4 has ADP max/min Ratio ..... 3.8 oblate  
PLAT243\_ALERT\_4\_C High 'Solvent' Ueq as Compared to Neighbors of C37 Check  
PLAT244\_ALERT\_4\_C Low 'Solvent' Ueq as Compared to Neighbors of C36 Check  
PLAT250\_ALERT\_2\_C Large U3/U1 Ratio for Average U(i,j) Tensor .... 3.8 Note  
PLAT331\_ALERT\_2\_C Small Average Phenyl C-C Dist. C36 -C41 1.37 Ang.  
PLAT342\_ALERT\_3\_C Low Bond Precision on C-C Bonds ..... 0.0108 Ang.  
PLAT601\_ALERT\_2\_C Structure Contains Solvent Accessible VOIDS of . 62 Ang3  
PLAT906\_ALERT\_3\_C Large K value in the Analysis of Variance ..... 3.820 Check  
PLAT911\_ALERT\_3\_C Missing # FCF Refl Between THmin & STh/L= 0.600 18 Report  
PLAT913\_ALERT\_3\_C Missing # of Very Strong Reflections in FCF .... 2 Note  
PLAT971\_ALERT\_2\_C Check Calcd Residual Density 1.02A From Cel 2.26 eA-3

**Author Response: The residual density could not be modelled as any chemically sensible species. Since the peak is in the proximity of a strong absorber, this could be due to imperfections in the absorption corrections.**

PLAT975\_ALERT\_2\_C Check Calcd Residual Density 0.85A From N6 0.78 eA-3  
PLAT975\_ALERT\_2\_C Check Calcd Residual Density 0.80A From N14 0.68 eA-3

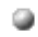

#### Alert level G

PLAT003\_ALERT\_2\_G Number of Uiso or Uij Restrained non-H Atoms ... 7 Report  
PLAT380\_ALERT\_4\_G Incorrectly? Oriented X(sp2)-Methyl Moiety ..... C42 Check  
PLAT860\_ALERT\_3\_G Number of Least-Squares Restraints ..... 51 Note

- 0 **ALERT level A** = Most likely a serious problem - resolve or explain  
2 **ALERT level B** = A potentially serious problem, consider carefully  
14 **ALERT level C** = Check. Ensure it is not caused by an omission or oversight  
3 **ALERT level G** = General information/check it is not something unexpected
- 0 ALERT type 1 CIF construction/syntax error, inconsistent or missing data

10 ALERT type 2 Indicator that the structure model may be wrong or deficient  
6 ALERT type 3 Indicator that the structure quality may be low  
3 ALERT type 4 Improvement, methodology, query or suggestion  
0 ALERT type 5 Informative message, check

---

## Datablock: 2

---

Bond precision: C-C = 0.0066 A Wavelength=0.71073

Cell: a=14.2034(4) b=20.6250(7) c=17.1106(6)  
alpha=90 beta=95.066(3) gamma=90

Temperature: 150 K

|                | Calculated                    | Reported                      |
|----------------|-------------------------------|-------------------------------|
| Volume         | 4992.9(3)                     | 4992.9(3)                     |
| Space group    | P 21/c                        | P 1 21/c 1                    |
| Hall group     | -P 2ybc                       | -P 2ybc                       |
| Moiety formula | C40 H52 B2 Ce N14, 2(C4 H8 O) | C40 H52 B2 Ce N14, 2(C4 H8 O) |
| Sum formula    | C48 H68 B2 Ce N14 O2          | C48 H68 B2 Ce N14 O2          |
| Mr             | 1034.90                       | 1034.90                       |
| Dx,g cm-3      | 1.377                         | 1.377                         |
| Z              | 4                             | 4                             |
| Mu (mm-1)      | 0.965                         | 0.965                         |
| F000           | 2152.0                        | 2152.0                        |
| F000'          | 2151.54                       |                               |
| h,k,lmax       | 17,24,20                      | 17,24,20                      |
| Nref           | 9143                          | 9125                          |
| Tmin,Tmax      | 0.894,0.912                   | 0.951,1.000                   |
| Tmin'          | 0.894                         |                               |

Correction method= # Reported T Limits: Tmin=0.951 Tmax=1.000  
AbsCorr = GAUSSIAN

Data completeness= 0.998 Theta(max)= 25.350

R(reflections)= 0.0523( 7004) wR2(reflections)= 0.1163( 9125)

S = 1.035 Npar= 708

---

The following ALERTS were generated. Each ALERT has the format  
**test-name\_ALERT\_alert-type\_alert-level.**  
Click on the hyperlinks for more details of the test.

---

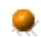

### Alert level B

PLAT910\_ALERT\_3\_B Missing # of FCF Reflection(s) Below Th(Min) ...

17 Report

**Author Response: Reduction of beam stop mask did not yield significant improvement. Most of those missing strong reflections appeared to be very strong and were treated as overflows.**

---

● **Alert level C**

|                   |                                                  |                 |             |
|-------------------|--------------------------------------------------|-----------------|-------------|
| PLAT413_ALERT_2_C | Short Inter XH3 .. XHn                           | H14C .. H46C .. | 2.12 Ang.   |
| PLAT906_ALERT_3_C | Large K value in the Analysis of Variance .....  |                 | 5.852 Check |
| PLAT911_ALERT_3_C | Missing # FCF Refl Between THmin & STh/L=        | 0.600           | 2 Report    |
| PLAT913_ALERT_3_C | Missing # of Very Strong Reflections in FCF .... |                 | 1 Note      |
| PLAT971_ALERT_2_C | Check Calcd Residual Density                     | 1.09A From Cel  | 1.74 eA-3   |
| PLAT972_ALERT_2_C | Check Calcd Residual Density                     | 1.11A From Cel  | -1.59 eA-3  |
| PLAT972_ALERT_2_C | Check Calcd Residual Density                     | 0.93A From Cel  | -1.53 eA-3  |

---

● **Alert level G**

|                   |                                                  |              |          |
|-------------------|--------------------------------------------------|--------------|----------|
| PLAT002_ALERT_2_G | Number of Distance or Angle Restraints on AtSite |              | 20 Note  |
| PLAT003_ALERT_2_G | Number of Uiso or Uij Restrained non-H Atoms ... |              | 8 Report |
| PLAT176_ALERT_4_G | The CIF-Embedded .res File Contains SADI Records |              | 3 Report |
| PLAT178_ALERT_4_G | The CIF-Embedded .res File Contains SIMU Records |              | 1 Report |
| PLAT302_ALERT_4_G | Anion/Solvent Disorder .....                     | Percentage = | 100 Note |
| PLAT304_ALERT_4_G | Non-Integer Number of Atoms ( 8.09) in Resd. #   |              | 2 Check  |
| PLAT304_ALERT_4_G | Non-Integer Number of Atoms ( 7.05) in Resd. #   |              | 3 Check  |
| PLAT304_ALERT_4_G | Non-Integer Number of Atoms ( 4.91) in Resd. #   |              | 4 Check  |
| PLAT304_ALERT_4_G | Non-Integer Number of Atoms ( 5.95) in Resd. #   |              | 5 Check  |
| PLAT860_ALERT_3_G | Number of Least-Squares Restraints .....         |              | 158 Note |

---

0 **ALERT level A** = Most likely a serious problem - resolve or explain  
1 **ALERT level B** = A potentially serious problem, consider carefully  
7 **ALERT level C** = Check. Ensure it is not caused by an omission or oversight  
10 **ALERT level G** = General information/check it is not something unexpected

0 ALERT type 1 CIF construction/syntax error, inconsistent or missing data  
6 ALERT type 2 Indicator that the structure model may be wrong or deficient  
5 ALERT type 3 Indicator that the structure quality may be low  
7 ALERT type 4 Improvement, methodology, query or suggestion  
0 ALERT type 5 Informative message, check

---

## Datablock: 3

---

Bond precision: C-C = 0.0081 A

Wavelength=1.54184

Cell: a=10.0579(4) b=13.3606(6) c=13.6905(7)  
alpha=87.438(4) beta=73.681(4) gamma=71.869(4)

Temperature: 100 K

|                | Calculated            | Reported                             |
|----------------|-----------------------|--------------------------------------|
| Volume         | 1676.10(14)           | 1676.10(14)                          |
| Space group    | P -1                  | P -1                                 |
| Hall group     | -P 1                  | -P 1                                 |
| Moiety formula | C50 H74 B4 Ce2 N20 O2 | C50 H74 B4 Ce2 N20 O2,<br>2(C4 H8 O) |
| Sum formula    | C50 H74 B4 Ce2 N20 O2 | C62 H90 B4 Ce2 N20 O4                |
| Mr             | 1310.77               | 1447.64                              |
| Dx,g cm-3      | 1.299                 | 1.291                                |
| Z              | 1                     | 1                                    |
| Mu (mm-1)      | 10.750                | 10.730                               |
| F000           | 666.0                 | 662.0                                |
| F000'          | 664.08                |                                      |
| h,k,lmax       | 12,16,16              | 12,16,16                             |
| Nref           | 6139                  | 5891                                 |
| Tmin,Tmax      | 0.088,0.172           | 0.197,1.000                          |
| Tmin'          | 0.013                 |                                      |

Correction method= # Reported T Limits: Tmin=0.197 Tmax=1.000  
AbsCorr = MULTI-SCAN

Data completeness= 0.960                      Theta(max)= 68.251

R(reflections)= 0.0448( 5342)              wR2(reflections)= 0.1153( 5891)

S = 1.040                                      Npar= 368

The following ALERTS were generated. Each ALERT has the format  
**test-name\_ALERT\_alert-type\_alert-level.**  
Click on the hyperlinks for more details of the test.

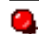

#### Alert level A

CHEMW03\_ALERT\_2\_A ALERT: The ratio of given/expected molecular weight as  
calculated from the \_atom\_site\* data lies outside  
the range 0.90 <> 1.10

From the CIF: \_cell\_formula\_units\_Z 1

From the CIF: \_chemical\_formula\_weight 1447.64

TEST: Calculate formula weight from \_atom\_site\_\*

| atom | mass   | num   | sum    |
|------|--------|-------|--------|
| C    | 12.01  | 50.00 | 600.55 |
| H    | 1.01   | 74.00 | 74.59  |
| B    | 10.81  | 4.00  | 43.24  |
| Ce   | 140.12 | 2.00  | 280.24 |
| N    | 14.01  | 20.00 | 280.14 |
| O    | 16.00  | 2.00  | 32.00  |

Calculated formula weight 1310.76

PLAT046\_ALERT\_1\_A Reported Z, MW and D(calc) are Inconsistent .... 1.434

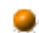

#### Alert level B

DENSD01\_ALERT\_1\_B The ratio of the submitted crystal density and that  
calculated from the formula is outside the range 0.95 <> 1.05

Crystal density given = 1.291  
Calculated crystal density = 1.434

---

● **Alert level C**

ABSMU01\_ALERT\_1\_C The ratio of given/expected absorption coefficient lies outside the range 0.99 <> 1.01  
Calculated value of mu = 10.851  
Value of mu given = 10.730

CHEMW01\_ALERT\_1\_C The ratio of given/expected molecular weight as calculated from the \_chemical\_formula\_sum lies outside the range 0.99 <> 1.01  
Calculated formula weight = 1503.0045  
Formula weight given = 1447.6400

CHEMW01\_ALERT\_1\_C The difference between the given and expected weight for compound is greater 1 mass unit. Check that all hydrogen atoms have been taken into account.

PLAT029\_ALERT\_3\_C \_diffn\_measured\_fraction\_theta\_full Low ..... 0.961 Note

PLAT041\_ALERT\_1\_C Calc. and Reported SumFormula Strings Differ Please Check

PLAT068\_ALERT\_1\_C Reported F000 Differs from Calcd (or Missing)... Please Check

PLAT342\_ALERT\_3\_C Low Bond Precision on C-C Bonds ..... 0.0081 Ang.

PLAT911\_ALERT\_3\_C Missing # FCF Refl Between THmin & STh/L= 0.600 239 Report

---

● **Alert level G**

FORMU01\_ALERT\_1\_G There is a discrepancy between the atom counts in the \_chemical\_formula\_sum and \_chemical\_formula\_moiety. This is usually due to the moiety formula being in the wrong format.  
Atom count from \_chemical\_formula\_sum: C62 H90 B4 Ce2 N20 O4  
Atom count from \_chemical\_formula\_moiety: C58 H90 B4 Ce2 N20 O4

FORMU01\_ALERT\_2\_G There is a discrepancy between the atom counts in the \_chemical\_formula\_sum and the formula from the \_atom\_site\* data.  
Atom count from \_chemical\_formula\_sum: C62 H90 B4 Ce2 N20 O4  
Atom count from the \_atom\_site data: C50 H74 B4 Ce2 N20 O2

CELLZ01\_ALERT\_1\_G Difference between formula and atom\_site contents detected.

CELLZ01\_ALERT\_1\_G ALERT: Large difference may be due to a symmetry error - see SYMMG tests  
From the CIF: \_cell\_formula\_units\_Z 1  
From the CIF: \_chemical\_formula\_sum C62 H90 B4 Ce2 N20 O4  
TEST: Compare cell contents of formula and atom\_site data

| atom | Z*formula | cif sites | diff  |
|------|-----------|-----------|-------|
| C    | 62.00     | 50.00     | 12.00 |
| H    | 90.00     | 74.00     | 16.00 |
| B    | 4.00      | 4.00      | 0.00  |
| Ce   | 2.00      | 2.00      | 0.00  |
| N    | 20.00     | 20.00     | 0.00  |
| O    | 4.00      | 2.00      | 2.00  |

PLAT003\_ALERT\_2\_G Number of Uiso or Uij Restrained non-H Atoms ... 39 Report

PLAT154\_ALERT\_1\_G The su's on the Cell Angles are Equal ..... 0.00400 Degree

PLAT380\_ALERT\_4\_G Incorrectly? Oriented X(sp2)-Methyl Moiety ..... C9 Check

PLAT606\_ALERT\_4\_G VERY LARGE Solvent Accessible VOID(S) in Structure ! Info

PLAT860\_ALERT\_3\_G Number of Least-Squares Restraints ..... 357 Note

PLAT869\_ALERT\_4\_G ALERTS Related to the use of SQUEEZE Suppressed ! Info

PLAT912\_ALERT\_4\_G Missing # of FCF Reflections Above STh/L= 0.600 10 Note

- 
- 2 **ALERT level A** = Most likely a serious problem - resolve or explain  
1 **ALERT level B** = A potentially serious problem, consider carefully  
8 **ALERT level C** = Check. Ensure it is not caused by an omission or oversight  
11 **ALERT level G** = General information/check it is not something unexpected

11 ALERT type 1 CIF construction/syntax error, inconsistent or missing data  
3 ALERT type 2 Indicator that the structure model may be wrong or deficient  
4 ALERT type 3 Indicator that the structure quality may be low  
4 ALERT type 4 Improvement, methodology, query or suggestion  
0 ALERT type 5 Informative message, check

---

## Datablock: 4

---

Bond precision: C-C = 0.0106 Å Wavelength=0.71073  
Cell: a=11.2609(3) b=12.5209(3) c=16.7464(4)  
alpha=105.035(2) beta=96.314(2) gamma=112.313(3)  
Temperature: 150 K

|                | Calculated               | Reported                 |
|----------------|--------------------------|--------------------------|
| Volume         | 2051.38(11)              | 2051.38(10)              |
| Space group    | P -1                     | P -1                     |
| Hall group     | -P 1                     | -P 1                     |
| Moiety formula | C30 H44 B2 Ce N15, C7 H8 | C30 H44 B2 Ce N15, C7 H8 |
| Sum formula    | C37 H52 B2 Ce N15        | C37 H52 B2 Ce N15        |
| Mr             | 868.68                   | 868.67                   |
| Dx,g cm-3      | 1.406                    | 1.406                    |
| Z              | 2                        | 2                        |
| Mu (mm-1)      | 1.157                    | 1.157                    |
| F000           | 894.0                    | 894.0                    |
| F000'          | 893.68                   |                          |
| h,k,lmax       | 13,15,20                 | 13,15,20                 |
| Nref           | 7512                     | 28373                    |
| Tmin,Tmax      | 0.754,0.861              | 0.687,1.000              |
| Tmin'          | 0.724                    |                          |

Correction method= # Reported T Limits: Tmin=0.687 Tmax=1.000  
AbsCorr = MULTI-SCAN

Data completeness= 3.777 Theta(max)= 25.346

R(reflections)= 0.0515( 22381) wR2(reflections)= 0.1518( 28373)

S = 1.097 Npar= 510

---

The following ALERTS were generated. Each ALERT has the format  
**test-name\_ALERT\_alert-type\_alert-level**.  
Click on the hyperlinks for more details of the test.

---

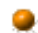

### Alert level B

PLAT910\_ALERT\_3\_B Missing # of FCF Reflection(s) Below Th(Min) ...

14 Report

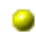

### Alert level C

---

|                   |                                                  |        |        |
|-------------------|--------------------------------------------------|--------|--------|
| PLAT342_ALERT_3_C | Low Bond Precision on C-C Bonds .....            | 0.0106 | Ang.   |
| PLAT906_ALERT_3_C | Large K value in the Analysis of Variance .....  | 2.530  | Check  |
| PLAT911_ALERT_3_C | Missing # FCF Refl Between THmin & STh/L= 0.600  | 6      | Report |
| PLAT918_ALERT_3_C | Reflection(s) with I(obs) much smaller I(calc) . | 2      | Check  |

---

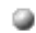

### Alert level G

---

|                   |                                                               |       |       |
|-------------------|---------------------------------------------------------------|-------|-------|
| PLAT021_ALERT_4_G | Ratio Unique / Expected Reflections too High ...              | 3.777 |       |
| PLAT380_ALERT_4_G | Incorrectly? Oriented X(sp <sup>2</sup> )-Methyl Moiety ..... | C10   | Check |
| PLAT380_ALERT_4_G | Incorrectly? Oriented X(sp <sup>2</sup> )-Methyl Moiety ..... | C37   | Check |
| PLAT870_ALERT_4_G | ALERTS Related to Twinning Effects Suppressed ..              | !     | Info  |

---

- 
- 0 **ALERT level A** = Most likely a serious problem - resolve or explain  
 1 **ALERT level B** = A potentially serious problem, consider carefully  
 4 **ALERT level C** = Check. Ensure it is not caused by an omission or oversight  
 4 **ALERT level G** = General information/check it is not something unexpected
- 0 ALERT type 1 CIF construction/syntax error, inconsistent or missing data  
 0 ALERT type 2 Indicator that the structure model may be wrong or deficient  
 5 ALERT type 3 Indicator that the structure quality may be low  
 4 ALERT type 4 Improvement, methodology, query or suggestion  
 0 ALERT type 5 Informative message, check
- 

It is advisable to attempt to resolve as many as possible of the alerts in all categories. Often the minor alerts point to easily fixed oversights, errors and omissions in your CIF or refinement strategy, so attention to these fine details can be worthwhile. In order to resolve some of the more serious problems it may be necessary to carry out additional measurements or structure refinements. However, the purpose of your study may justify the reported deviations and the more serious of these should normally be commented upon in the discussion or experimental section of a paper or in the "special\_details" fields of the CIF. checkCIF was carefully designed to identify outliers and unusual parameters, but every test has its limitations and alerts that are not important in a particular case may appear. Conversely, the absence of alerts does not guarantee there are no aspects of the results needing attention. It is up to the individual to critically assess their own results and, if necessary, seek expert advice.

### Publication of your CIF in IUCr journals

A basic structural check has been run on your CIF. These basic checks will be run on all CIFs submitted for publication in IUCr journals (*Acta Crystallographica*, *Journal of Applied Crystallography*, *Journal of Synchrotron Radiation*); however, if you intend to submit to *Acta Crystallographica Section C* or *E*, you should make sure that full publication checks are run on the final version of your CIF prior to submission.

### Publication of your CIF in other journals

Please refer to the *Notes for Authors* of the relevant journal for any special instructions relating to CIF submission.

---



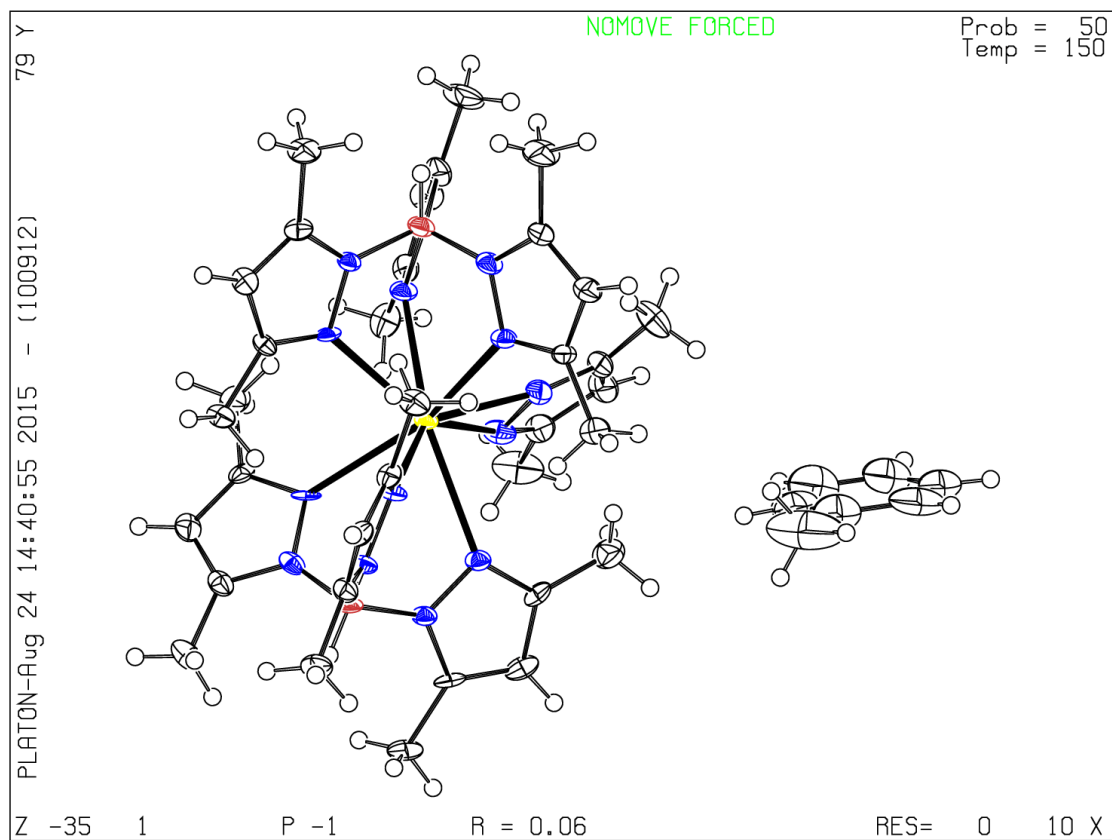

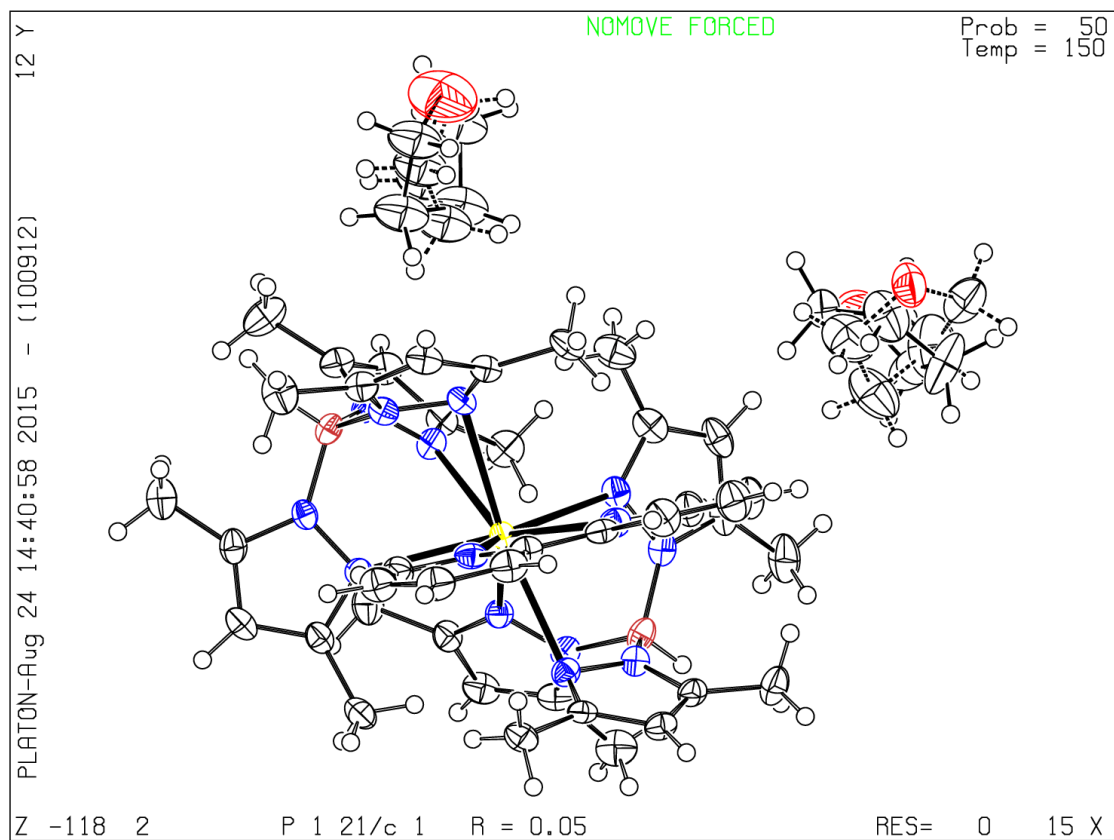

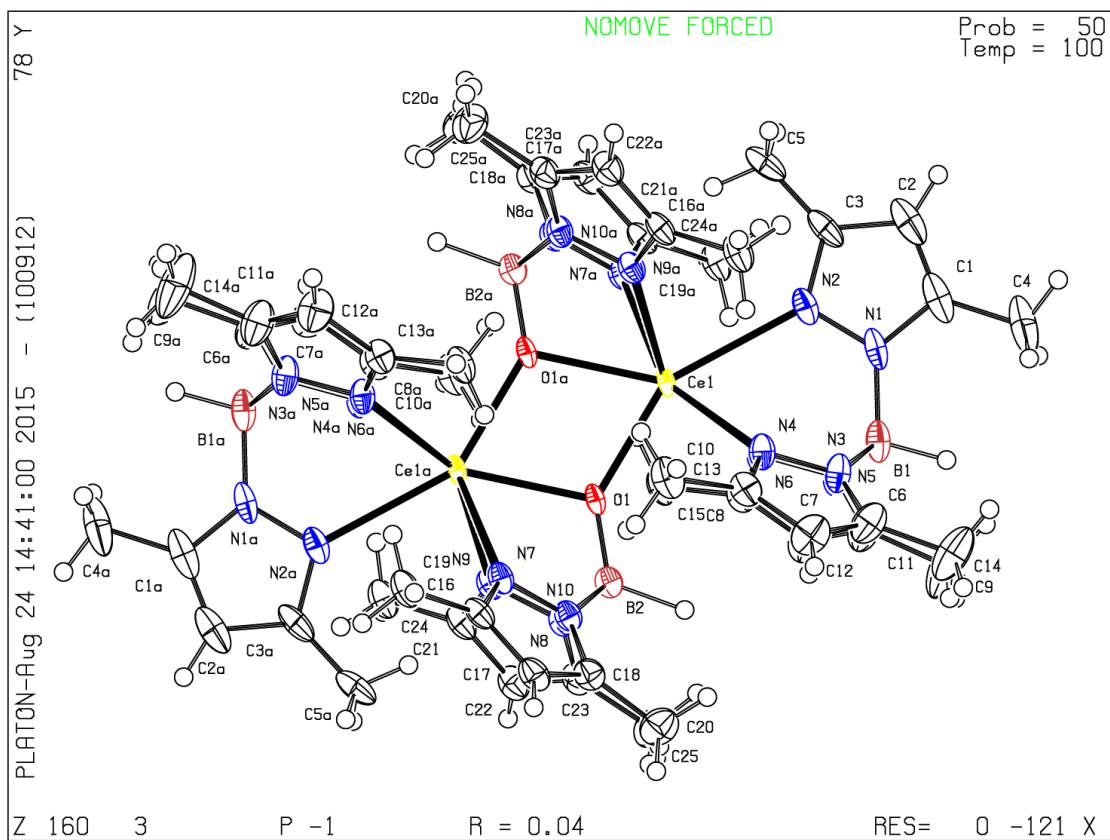

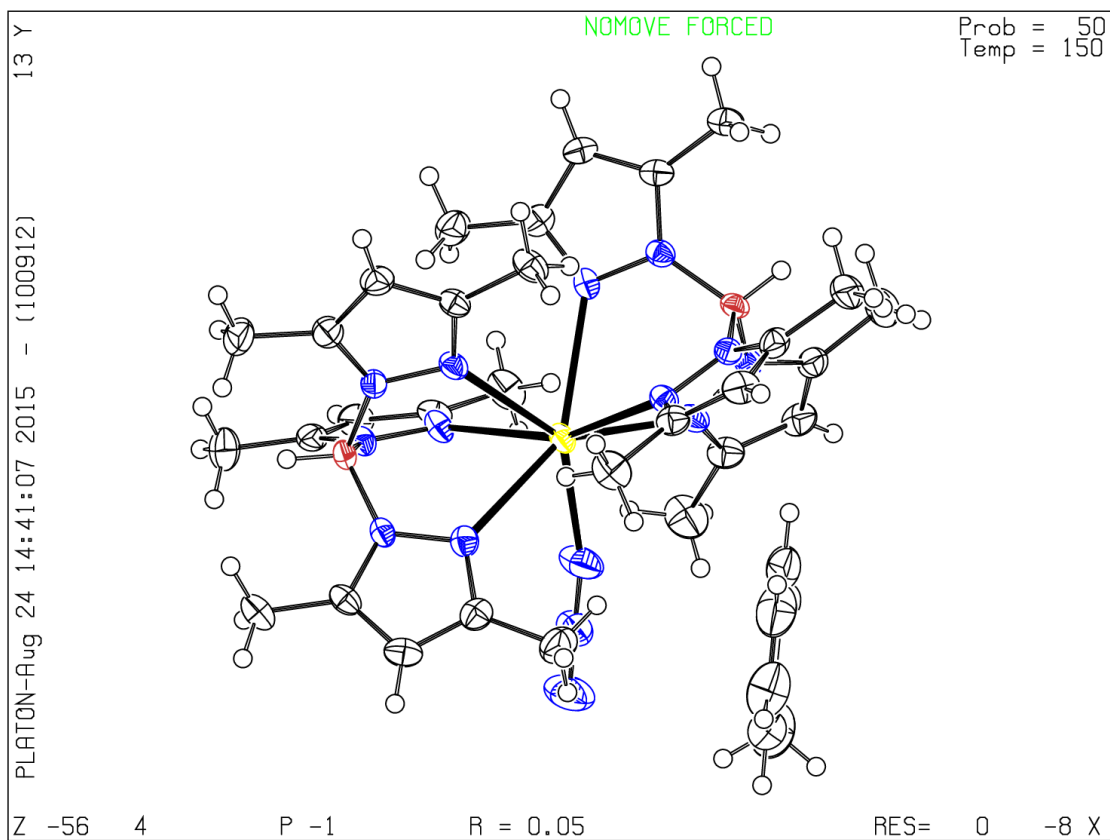

Supplement: s1 [file s1]
